# Supplementary material for: Progression of Postprandial Blood Plasma Phospholipids Following Acute Intake of Different Dairy Matrices: A Randomized Crossover Trial
Source: MDPI journal article supplement (doi:10.3390/metabo11070454), 2021-07-14
Supplement: s1 [file s1]

## Supplementary data

Table S1. Relative level of ceramide (CER) in plasma samples. Data were analyzed by repeated measures using linear mixed model. Overall participant and within-visit participant differences were included as random factors and the analyses were adjusted for BMI, age and visit.  $q$ -values indicate FDR-adjusted  $p$ -values for meal-time interactions ( $q_{meal*time}$ ), the effect of meal ( $q_{meal}$ ) and the effect of time ( $q_{time}$ ).

|               | 0     | 30    | 60    | 90    | 120   | 180   | 240   | 300   | 360   | 420   | 480   | q <sub>meal</sub> *time | q <sub>meal</sub> | q <sub>time</sub> |
|---------------|-------|-------|-------|-------|-------|-------|-------|-------|-------|-------|-------|-------------------------|-------------------|-------------------|
| CER 18:0_18:2 |       |       |       |       |       |       |       |       |       |       |       |                         |                   |                   |
| Cheese        | 0.003 | 0.003 | 0.001 | 0.001 | 0.001 | 0.001 | 0.001 | 0.002 | 0.001 | 0.001 | 0.001 | 0.833                   | 0.562             | 0.392             |
| Hom. Cheese   | 0.001 | 0.002 | 0.002 | 0.001 | 0.001 | 0.001 | 0.001 | 0.001 | 0.013 | 0.001 | 0.001 |                         |                   |                   |
| MCI Drink     | 0.014 | 0.009 | 0.001 | 0.001 | 0.001 | 0.004 | 0.001 | 0.002 | 0.013 | 0.009 | 0.004 |                         |                   |                   |
| MCI Gel       | 0.001 | 0.001 | 0.001 | 0.001 | 0.001 | 0.001 | 0.001 | 0.001 | 0.001 | 0.001 | 0.001 |                         |                   |                   |
| CER 18:0_18:1 |       |       |       |       |       |       |       |       |       |       |       |                         |                   |                   |
| Cheese        | 0.007 | 0.009 | 0.007 | 0.006 | 0.012 | 0.005 | 0.006 | 0.010 | 0.009 | 0.007 | 0.014 | 0.687                   | 0.562             | 0.235             |
| Hom. Cheese   | 0.008 | 0.007 | 0.005 | 0.006 | 0.008 | 0.006 | 0.008 | 0.006 | 0.014 | 0.008 | 0.009 |                         |                   |                   |
| MCI Drink     | 0.018 | 0.011 | 0.008 | 0.005 | 0.005 | 0.008 | 0.007 | 0.007 | 0.010 | 0.009 | 0.010 |                         |                   |                   |
| MCI Gel       | 0.006 | 0.008 | 0.009 | 0.008 | 0.008 | 0.007 | 0.009 | 0.009 | 0.009 | 0.007 | 0.008 |                         |                   |                   |
| CER 18:0_20:2 |       |       |       |       |       |       |       |       |       |       |       |                         |                   |                   |
| Cheese        | 0.001 | 0.001 | 0.001 | 0.001 | 0.002 | 0.001 | 0.001 | 0.001 | 0.001 | 0.001 | 0.001 | 0.794                   | 0.791             | 0.713             |
| Hom. Cheese   | 0.001 | 0.001 | 0.001 | 0.001 | 0.001 | 0.001 | 0.001 | 0.001 | 0.002 | 0.001 | 0.002 |                         |                   |                   |
| MCI Drink     | 0.002 | 0.002 | 0.001 | 0.001 | 0.001 | 0.001 | 0.001 | 0.001 | 0.002 | 0.001 | 0.001 |                         |                   |                   |
| MCI Gel       | 0.001 | 0.001 | 0.001 | 0.001 | 0.001 | 0.001 | 0.001 | 0.001 | 0.001 | 0.001 | 0.001 |                         |                   |                   |
| CER 18:0_22:1 |       |       |       |       |       |       |       |       |       |       |       |                         |                   |                   |
| Cheese        | 0.116 | 0.151 | 0.125 | 0.126 | 0.236 | 0.098 | 0.121 | 0.159 | 0.173 | 0.112 | 0.195 | 0.794                   | 0.695             | 0.479             |
| Hom. Cheese   | 0.152 | 0.123 | 0.104 | 0.128 | 0.146 | 0.132 | 0.162 | 0.125 | 0.172 | 0.165 | 0.156 |                         |                   |                   |
| MCI Drink     | 0.285 | 0.217 | 0.147 | 0.109 | 0.108 | 0.150 | 0.129 | 0.160 | 0.134 | 0.153 | 0.214 |                         |                   |                   |
| MCI Gel       | 0.124 | 0.151 | 0.142 | 0.146 | 0.157 | 0.138 | 0.148 | 0.159 | 0.161 | 0.127 | 0.114 |                         |                   |                   |
| CER 18:0_24:0 |       |       |       |       |       |       |       |       |       |       |       |                         |                   |                   |
| Cheese        | 0.095 | 0.134 | 0.096 | 0.101 | 0.183 | 0.081 | 0.097 | 0.129 | 0.141 | 0.099 | 0.156 | 0.794                   | 0.564             | 0.170             |
| Hom. Cheese   | 0.132 | 0.107 | 0.092 | 0.101 | 0.121 | 0.108 | 0.127 | 0.101 | 0.146 | 0.137 | 0.131 |                         |                   |                   |
| MCI Drink     | 0.307 | 0.189 | 0.121 | 0.099 | 0.087 | 0.119 | 0.102 | 0.133 | 0.118 | 0.134 | 0.205 |                         |                   |                   |
| MCI Gel       | 0.095 | 0.113 | 0.110 | 0.116 | 0.119 | 0.106 | 0.116 | 0.138 | 0.128 | 0.101 | 0.097 |                         |                   |                   |
| CER 18:0_26:3 |       |       |       |       |       |       |       |       |       |       |       |                         |                   |                   |
| Cheese        | 0.003 | 0.003 | 0.002 | 0.002 | 0.004 | 0.001 | 0.002 | 0.002 | 0.003 | 0.002 | 0.003 | 0.794                   | 0.564             | 0.764             |
| Hom. Cheese   | 0.003 | 0.002 | 0.002 | 0.002 | 0.003 | 0.002 | 0.003 | 0.002 | 0.005 | 0.004 | 0.002 |                         |                   |                   |
| MCI Drink     | 0.009 | 0.005 | 0.003 | 0.002 | 0.002 | 0.004 | 0.002 | 0.003 | 0.006 | 0.004 | 0.003 |                         |                   |                   |

|               |       |       |       |       |       |       |       |       |       |       |       |       |       |       |
|---------------|-------|-------|-------|-------|-------|-------|-------|-------|-------|-------|-------|-------|-------|-------|
| MCI Gel       | 0.002 | 0.002 | 0.002 | 0.003 | 0.003 | 0.003 | 0.003 | 0.002 | 0.003 | 0.002 | 0.002 | 0.794 | 0.149 | 0.630 |
| CER 18:0_26:2 |       |       |       |       |       |       |       |       |       |       |       |       |       |       |
| Cheese        | 0.005 | 0.005 | 0.004 | 0.004 | 0.006 | 0.004 | 0.005 | 0.005 | 0.005 | 0.005 | 0.007 |       |       |       |
| Hom. Cheese   | 0.005 | 0.005 | 0.004 | 0.004 | 0.005 | 0.004 | 0.005 | 0.003 | 0.007 | 0.006 | 0.005 |       |       |       |
| MCI Drink     | 0.010 | 0.009 | 0.005 | 0.004 | 0.003 | 0.006 | 0.004 | 0.005 | 0.005 | 0.007 | 0.006 |       |       |       |
| MCI Gel       | 0.004 | 0.004 | 0.004 | 0.005 | 0.005 | 0.004 | 0.005 | 0.004 | 0.004 | 0.004 | 0.004 |       |       |       |

Table S2. Relative level of sphingomyelin (SM) in plasma samples. Data were analyzed by repeated measures using linear mixed model. Overall participant and within-visit participant differences were included as random factors and the analyses were adjusted for BMI, age and visit.  $q$ -values indicate FDR-adjusted  $p$ -values for meal-time interactions ( $q_{meal*time}$ ), the effect of meal ( $q_{meal}$ ) and the effect of time ( $q_{time}$ ). \* indicate significant differences ( $q < 0.05$ ).

|              | 0      | 30     | 60     | 90     | 120    | 180    | 240    | 300    | 360    | 420    | 480    | q <sub>meal*time</sub> | q <sub>meal</sub> | q <sub>time</sub> |
|--------------|--------|--------|--------|--------|--------|--------|--------|--------|--------|--------|--------|------------------------|-------------------|-------------------|
| SM 18:0_14:0 |        |        |        |        |        |        |        |        |        |        |        |                        |                   |                   |
| Cheese       | 1.126  | 1.541  | 1.095  | 0.995  | 1.470  | 1.137  | 1.440  | 1.261  | 1.358  | 1.502  | 1.442  | 0.902                  | 0.823             | 0.001*            |
| Hom. Cheese  | 1.403  | 1.253  | 1.252  | 1.146  | 1.093  | 1.203  | 1.310  | 1.544  | 1.621  | 1.559  | 1.512  |                        |                   |                   |
| MCI Drink    | 1.212  | 1.687  | 1.275  | 1.250  | 1.397  | 1.326  | 1.704  | 1.380  | 1.237  | 1.260  | 1.493  |                        |                   |                   |
| MCI Gel      | 1.099  | 1.251  | 1.120  | 1.141  | 1.158  | 1.075  | 1.286  | 2.004  | 1.538  | 1.389  | 1.590  |                        |                   |                   |
| SM 18:0_20:0 |        |        |        |        |        |        |        |        |        |        |        |                        |                   |                   |
| Cheese       | 5.226  | 6.038  | 5.214  | 4.552  | 5.543  | 5.038  | 5.473  | 5.676  | 6.041  | 5.707  | 6.141  | 0.833                  | 0.564             | 0.143             |
| Hom. Cheese  | 5.827  | 4.734  | 5.654  | 4.927  | 4.959  | 5.054  | 4.946  | 6.209  | 5.494  | 5.713  | 6.030  |                        |                   |                   |
| MCI Drink    | 4.875  | 5.529  | 5.654  | 5.209  | 5.213  | 6.107  | 5.187  | 5.977  | 4.980  | 5.480  | 5.379  |                        |                   |                   |
| MCI Gel      | 5.049  | 5.418  | 4.934  | 5.001  | 5.465  | 4.794  | 4.936  | 5.370  | 5.016  | 5.477  | 5.754  |                        |                   |                   |
| SM 18:0_22:1 |        |        |        |        |        |        |        |        |        |        |        |                        |                   |                   |
| Cheese       | 15.521 | 17.013 | 15.465 | 14.489 | 17.481 | 14.973 | 15.927 | 17.488 | 19.044 | 16.724 | 18.949 | 0.833                  | 0.564             | 0.235             |
| Hom. Cheese  | 17.638 | 14.876 | 17.551 | 15.818 | 14.388 | 15.108 | 15.513 | 18.510 | 17.211 | 18.322 | 18.512 |                        |                   |                   |
| MCI Drink    | 15.615 | 16.086 | 18.206 | 16.681 | 16.690 | 19.253 | 16.708 | 19.475 | 15.764 | 17.480 | 17.154 |                        |                   |                   |
| MCI Gel      | 15.438 | 15.567 | 14.952 | 15.922 | 17.381 | 14.654 | 15.799 | 15.742 | 15.447 | 17.386 | 17.613 |                        |                   |                   |
| SM 18:1_22:0 |        |        |        |        |        |        |        |        |        |        |        |                        |                   |                   |
| Cheese       | 15.537 | 17.016 | 15.574 | 14.282 | 17.430 | 15.141 | 15.952 | 17.474 | 19.030 | 16.749 | 19.134 | 0.833                  | 0.564             | 0.175             |
| Hom. Cheese  | 17.614 | 14.919 | 17.475 | 15.587 | 14.440 | 15.058 | 15.552 | 18.503 | 17.091 | 18.264 | 18.537 |                        |                   |                   |
| MCI Drink    | 15.504 | 16.041 | 18.218 | 16.603 | 16.746 | 19.468 | 16.604 | 19.496 | 15.732 | 17.525 | 17.148 |                        |                   |                   |
| MCI Gel      | 15.433 | 15.538 | 14.864 | 15.779 | 17.443 | 14.534 | 16.023 | 15.736 | 15.589 | 17.456 | 17.685 |                        |                   |                   |
| SM 18:0_22:0 |        |        |        |        |        |        |        |        |        |        |        |                        |                   |                   |
| Cheese       | 0.891  | 0.978  | 0.835  | 0.833  | 0.970  | 0.820  | 0.876  | 0.966  | 1.037  | 0.944  | 1.064  | 0.833                  | 0.564             | 0.143             |
| Hom. Cheese  | 0.910  | 0.787  | 0.975  | 0.906  | 0.764  | 0.866  | 0.771  | 1.047  | 0.877  | 0.984  | 1.027  |                        |                   |                   |
| MCI Drink    | 0.836  | 0.925  | 0.918  | 0.842  | 0.883  | 1.108  | 0.936  | 1.167  | 0.911  | 0.985  | 0.971  |                        |                   |                   |
| MCI Gel      | 0.862  | 0.900  | 0.813  | 0.886  | 0.997  | 0.793  | 0.866  | 0.914  | 0.795  | 0.946  | 0.972  |                        |                   |                   |
| SM 18:1_23:0 |        |        |        |        |        |        |        |        |        |        |        |                        |                   |                   |
| Cheese       | 3.288  | 3.615  | 2.913  | 2.845  | 3.346  | 3.012  | 3.353  | 3.176  | 3.575  | 3.213  | 3.478  | 0.794                  | 0.564             | 0.677             |
| Hom. Cheese  | 3.836  | 2.844  | 3.453  | 3.192  | 3.065  | 3.384  | 3.210  | 3.910  | 3.599  | 3.571  | 3.768  |                        |                   |                   |
| MCI Drink    | 3.806  | 3.575  | 3.645  | 3.649  | 3.458  | 3.935  | 3.218  | 3.517  | 3.361  | 3.477  | 3.656  |                        |                   |                   |
| MCI Gel      | 3.046  | 3.416  | 3.191  | 3.325  | 3.461  | 3.258  | 3.019  | 3.446  | 3.256  | 3.294  | 3.400  |                        |                   |                   |
| SM 18:0_23:0 |        |        |        |        |        |        |        |        |        |        |        |                        |                   |                   |
| Cheese       | 0.130  | 0.139  | 0.122  | 0.106  | 0.119  | 0.116  | 0.129  | 0.115  | 0.123  | 0.119  | 0.132  | 0.794                  | 0.451             | 0.689             |

|                     |       |       |       |       |       |       |       |       |       |       |       |       |       |       |
|---------------------|-------|-------|-------|-------|-------|-------|-------|-------|-------|-------|-------|-------|-------|-------|
| Hom. Cheese         | 0.160 | 0.111 | 0.149 | 0.137 | 0.127 | 0.129 | 0.110 | 0.145 | 0.135 | 0.149 | 0.151 | 0.794 | 0.649 | 0.689 |
| MCI Drink           | 0.136 | 0.149 | 0.150 | 0.141 | 0.123 | 0.136 | 0.124 | 0.127 | 0.120 | 0.129 | 0.138 |       |       |       |
| MCI Gel             | 0.107 | 0.140 | 0.119 | 0.136 | 0.133 | 0.103 | 0.109 | 0.129 | 0.113 | 0.125 | 0.132 |       |       |       |
| <b>SM 18:0 24:0</b> |       |       |       |       |       |       |       |       |       |       |       |       |       |       |
| Cheese              | 1.222 | 1.164 | 1.191 | 1.035 | 1.247 | 1.116 | 1.064 | 1.141 | 1.269 | 1.062 | 1.157 | 0.794 | 0.649 | 0.689 |
| Hom. Cheese         | 1.351 | 1.228 | 1.239 | 1.134 | 0.978 | 1.096 | 1.060 | 1.299 | 1.185 | 1.217 | 1.252 |       |       |       |
| MCI Drink           | 1.048 | 1.285 | 1.339 | 1.241 | 1.143 | 1.378 | 1.095 | 1.272 | 1.033 | 1.262 | 1.026 |       |       |       |
| MCI Gel             | 1.130 | 1.349 | 1.095 | 1.131 | 1.254 | 0.978 | 1.003 | 1.030 | 1.052 | 1.191 | 1.148 |       |       |       |

Table S3. Relative level of phosphatidylethanolamine (PE) in plasma samples. Data were analyzed by repeated measures using linear mixed model. Overall participant and within-visit participant differences were included as random factors and the analyses were adjusted for BMI, age and visit. q-values indicate FDR-adjusted p-values for meal-time interactions ( $q_{meal*time}$ ), the effect of meal ( $q_{meal}$ ) and the effect of time ( $q_{time}$ ). \* indicate significant differences ( $q < 0.05$ ).

|              | 0      | 30     | 60     | 90     | 120    | 180    | 240    | 300    | 360    | 420    | 480    | q <sub>meal*time</sub> | q <sub>meal</sub> | q <sub>time</sub> |
|--------------|--------|--------|--------|--------|--------|--------|--------|--------|--------|--------|--------|------------------------|-------------------|-------------------|
| PE 18:1_16:0 |        |        |        |        |        |        |        |        |        |        |        |                        |                   |                   |
| Cheese       | 2.740  | 2.834  | 2.435  | 2.486  | 2.739  | 2.769  | 3.004  | 2.593  | 3.293  | 2.970  | 3.130  | 0.794                  | 0.562             | 0.010*            |
| Hom. Cheese  | 3.198  | 2.372  | 3.117  | 2.660  | 2.613  | 3.003  | 2.957  | 3.360  | 3.051  | 3.153  | 3.360  |                        |                   |                   |
| MCI Drink    | 2.602  | 2.658  | 2.965  | 2.922  | 2.872  | 2.983  | 2.778  | 2.868  | 2.768  | 2.956  | 3.425  |                        |                   |                   |
| MCI Gel      | 2.414  | 2.920  | 2.614  | 2.654  | 2.646  | 2.719  | 2.638  | 3.072  | 2.992  | 3.145  | 2.901  |                        |                   |                   |
| PE 18:0_16:0 |        |        |        |        |        |        |        |        |        |        |        |                        |                   |                   |
| Cheese       | 0.958  | 1.017  | 0.861  | 0.827  | 1.035  | 1.063  | 1.128  | 0.925  | 1.245  | 1.096  | 1.135  | 0.690                  | 0.451             | 0.001*            |
| Hom. Cheese  | 1.275  | 0.830  | 1.010  | 0.909  | 0.969  | 1.093  | 1.074  | 1.282  | 1.174  | 1.337  | 1.237  |                        |                   |                   |
| MCI Drink    | 0.939  | 0.948  | 1.140  | 1.031  | 1.011  | 1.128  | 0.999  | 1.075  | 1.013  | 1.141  | 1.219  |                        |                   |                   |
| MCI Gel      | 0.883  | 0.983  | 0.948  | 0.910  | 1.040  | 0.952  | 0.942  | 1.334  | 1.071  | 1.112  | 1.037  |                        |                   |                   |
| PE 16:0_18:2 |        |        |        |        |        |        |        |        |        |        |        |                        |                   |                   |
| Cheese       | 0.003  | 0.003  | 0.003  | 0.002  | 0.003  | 0.003  | 0.003  | 0.003  | 0.003  | 0.003  | 0.003  | 0.281                  | 0.649             | 0.115             |
| Hom. Cheese  | 0.003  | 0.002  | 0.003  | 0.002  | 0.003  | 0.003  | 0.003  | 0.003  | 0.003  | 0.004  | 0.003  |                        |                   |                   |
| MCI Drink    | 0.003  | 0.002  | 0.003  | 0.003  | 0.003  | 0.004  | 0.003  | 0.003  | 0.003  | 0.002  | 0.003  |                        |                   |                   |
| MCI Gel      | 0.002  | 0.003  | 0.002  | 0.003  | 0.003  | 0.003  | 0.003  | 0.003  | 0.003  | 0.003  | 0.002  |                        |                   |                   |
| PE 16:0_18:1 |        |        |        |        |        |        |        |        |        |        |        |                        |                   |                   |
| Cheese       | 0.080  | 0.119  | 0.110  | 0.119  | 0.161  | 0.168  | 0.179  | 0.163  | 0.205  | 0.141  | 0.147  | 0.794                  | 0.564             | <0.001*           |
| Hom. Cheese  | 0.087  | 0.069  | 0.112  | 0.109  | 0.137  | 0.162  | 0.170  | 0.198  | 0.144  | 0.174  | 0.130  |                        |                   |                   |
| MCI Drink    | 0.070  | 0.075  | 0.106  | 0.108  | 0.135  | 0.186  | 0.151  | 0.173  | 0.148  | 0.139  | 0.149  |                        |                   |                   |
| MCI Gel      | 0.082  | 0.078  | 0.109  | 0.125  | 0.150  | 0.156  | 0.173  | 0.198  | 0.160  | 0.152  | 0.118  |                        |                   |                   |
| PE 18:1_18:0 |        |        |        |        |        |        |        |        |        |        |        |                        |                   |                   |
| Cheese       | 0.957  | 1.227  | 0.991  | 0.959  | 1.106  | 1.124  | 1.369  | 1.227  | 1.581  | 1.579  | 1.606  | 0.826                  | 0.636             | <0.001*           |
| Hom. Cheese  | 1.098  | 0.874  | 1.143  | 1.013  | 1.057  | 1.151  | 1.193  | 1.574  | 1.423  | 1.500  | 1.587  |                        |                   |                   |
| MCI Drink    | 1.007  | 1.030  | 1.091  | 1.094  | 1.163  | 1.270  | 1.255  | 1.408  | 1.317  | 1.577  | 1.535  |                        |                   |                   |
| MCI Gel      | 0.900  | 1.075  | 0.943  | 1.002  | 1.095  | 1.141  | 1.152  | 1.427  | 1.367  | 1.470  | 1.432  |                        |                   |                   |
| PE 16:0_20:4 |        |        |        |        |        |        |        |        |        |        |        |                        |                   |                   |
| Cheese       | 53.017 | 57.307 | 51.906 | 48.563 | 59.892 | 56.121 | 58.931 | 59.369 | 69.447 | 60.739 | 68.412 | 0.794                  | 0.451             | <0.001*           |
| Hom. Cheese  | 61.113 | 50.573 | 63.995 | 50.759 | 50.825 | 57.478 | 56.898 | 65.733 | 64.281 | 64.382 | 66.614 |                        |                   |                   |
| MCI Drink    | 52.989 | 50.125 | 59.369 | 56.005 | 57.183 | 65.967 | 55.036 | 64.754 | 57.382 | 60.446 | 64.003 |                        |                   |                   |
| MCI Gel      | 48.995 | 50.552 | 49.740 | 52.496 | 55.114 | 52.344 | 52.093 | 58.255 | 54.810 | 62.010 | 57.733 |                        |                   |                   |
| PE 18:1_18:1 |        |        |        |        |        |        |        |        |        |        |        |                        |                   |                   |
| Cheese       | 0.004  | 0.007  | 0.007  | 0.007  | 0.010  | 0.011  | 0.010  | 0.011  | 0.013  | 0.010  | 0.008  | 0.833                  | 0.644             | <0.001*           |

|                     |        |        |        |        |        |        |        |        |        |        |        |       |       |         |
|---------------------|--------|--------|--------|--------|--------|--------|--------|--------|--------|--------|--------|-------|-------|---------|
| Hom. Cheese         | 0.006  | 0.004  | 0.008  | 0.007  | 0.009  | 0.010  | 0.011  | 0.011  | 0.010  | 0.009  | 0.007  |       |       |         |
| MCI Drink           | 0.004  | 0.005  | 0.007  | 0.009  | 0.010  | 0.014  | 0.010  | 0.010  | 0.009  | 0.008  | 0.009  |       |       |         |
| MCI Gel             | 0.006  | 0.005  | 0.007  | 0.008  | 0.010  | 0.012  | 0.012  | 0.014  | 0.011  | 0.011  | 0.006  |       |       |         |
| <b>PE 18:0_18:2</b> |        |        |        |        |        |        |        |        |        |        |        |       |       |         |
| Cheese              | 0.425  | 0.602  | 0.619  | 0.671  | 0.911  | 0.936  | 0.953  | 0.817  | 0.992  | 0.742  | 0.644  |       |       |         |
| Hom. Cheese         | 0.478  | 0.398  | 0.775  | 0.667  | 0.868  | 0.919  | 0.967  | 0.964  | 0.801  | 0.831  | 0.618  | 0.813 | 0.750 | <0.001* |
| MCI Drink           | 0.375  | 0.467  | 0.636  | 0.805  | 0.875  | 1.162  | 0.881  | 0.900  | 0.797  | 0.730  | 0.723  |       |       |         |
| MCI Gel             | 0.445  | 0.497  | 0.686  | 0.789  | 0.918  | 0.926  | 0.933  | 1.145  | 0.849  | 0.760  | 0.574  |       |       |         |
| <b>PE 18:0_18:1</b> |        |        |        |        |        |        |        |        |        |        |        |       |       |         |
| Cheese              | 0.080  | 0.128  | 0.136  | 0.143  | 0.182  | 0.202  | 0.212  | 0.184  | 0.221  | 0.163  | 0.133  |       |       |         |
| Hom. Cheese         | 0.089  | 0.084  | 0.164  | 0.137  | 0.168  | 0.195  | 0.203  | 0.225  | 0.171  | 0.185  | 0.131  | 0.833 | 0.564 | <0.001* |
| MCI Drink           | 0.083  | 0.105  | 0.138  | 0.158  | 0.193  | 0.244  | 0.192  | 0.199  | 0.185  | 0.159  | 0.171  |       |       |         |
| MCI Gel             | 0.089  | 0.106  | 0.134  | 0.170  | 0.197  | 0.198  | 0.213  | 0.254  | 0.199  | 0.182  | 0.138  |       |       |         |
| <b>PE 16:0_22:6</b> |        |        |        |        |        |        |        |        |        |        |        |       |       |         |
| Cheese              | 0.221  | 0.262  | 0.231  | 0.244  | 0.288  | 0.272  | 0.262  | 0.227  | 0.286  | 0.236  | 0.221  |       |       |         |
| Hom. Cheese         | 0.234  | 0.180  | 0.283  | 0.244  | 0.245  | 0.253  | 0.272  | 0.269  | 0.239  | 0.272  | 0.231  | 0.794 | 0.174 | 0.022*  |
| MCI Drink           | 0.171  | 0.183  | 0.246  | 0.242  | 0.239  | 0.265  | 0.202  | 0.240  | 0.212  | 0.222  | 0.215  |       |       |         |
| MCI Gel             | 0.193  | 0.226  | 0.255  | 0.238  | 0.246  | 0.220  | 0.209  | 0.246  | 0.192  | 0.220  | 0.201  |       |       |         |
| <b>PE 18:0_20:4</b> |        |        |        |        |        |        |        |        |        |        |        |       |       |         |
| Cheese              | 0.329  | 0.453  | 0.416  | 0.438  | 0.559  | 0.506  | 0.565  | 0.483  | 0.584  | 0.495  | 0.437  |       |       |         |
| Hom. Cheese         | 0.372  | 0.305  | 0.475  | 0.429  | 0.496  | 0.544  | 0.518  | 0.549  | 0.478  | 0.496  | 0.423  | 0.833 | 0.562 | <0.001* |
| MCI Drink           | 0.298  | 0.322  | 0.410  | 0.441  | 0.506  | 0.576  | 0.461  | 0.478  | 0.422  | 0.417  | 0.449  |       |       |         |
| MCI Gel             | 0.318  | 0.376  | 0.440  | 0.442  | 0.506  | 0.477  | 0.504  | 0.538  | 0.465  | 0.463  | 0.375  |       |       |         |
| <b>PE 18:2_22:1</b> |        |        |        |        |        |        |        |        |        |        |        |       |       |         |
| Cheese              | 39.710 | 42.988 | 37.436 | 35.693 | 43.560 | 40.425 | 42.981 | 42.256 | 49.570 | 44.956 | 48.597 |       |       |         |
| Hom. Cheese         | 43.243 | 35.578 | 46.275 | 37.381 | 37.567 | 41.949 | 41.338 | 47.545 | 45.366 | 46.135 | 47.329 | 0.833 | 0.149 | 0.003*  |
| MCI Drink           | 39.534 | 37.862 | 43.542 | 42.644 | 42.207 | 49.024 | 41.857 | 47.900 | 42.604 | 45.430 | 47.766 |       |       |         |
| MCI Gel             | 37.099 | 39.374 | 36.450 | 37.992 | 39.595 | 39.012 | 38.943 | 43.406 | 40.668 | 44.707 | 42.484 |       |       |         |
| <b>PE 18:0_22:6</b> |        |        |        |        |        |        |        |        |        |        |        |       |       |         |
| Cheese              | 0.109  | 0.136  | 0.126  | 0.134  | 0.160  | 0.142  | 0.137  | 0.125  | 0.162  | 0.122  | 0.112  |       |       |         |
| Hom. Cheese         | 0.114  | 0.097  | 0.147  | 0.140  | 0.130  | 0.151  | 0.152  | 0.147  | 0.129  | 0.147  | 0.111  | 0.794 | 0.294 | <0.001* |
| MCI Drink           | 0.090  | 0.103  | 0.128  | 0.130  | 0.136  | 0.134  | 0.110  | 0.131  | 0.107  | 0.121  | 0.110  |       |       |         |
| MCI Gel             | 0.098  | 0.119  | 0.135  | 0.134  | 0.151  | 0.141  | 0.119  | 0.138  | 0.115  | 0.124  | 0.110  |       |       |         |

Table S4. Relative level of phosphatidylcholine (PC) in plasma samples. Data were analyzed by repeated measures using linear mixed model. Overall participant and within-visit participant differences were included as random factors and the analyses were adjusted for BMI, age and visit. q-values indicate FDR-adjusted p-values for meal-time interactions ( $q_{meal*time}$ ), the effect of meal ( $q_{meal}$ ) and the effect of time ( $q_{time}$ ). \* indicate significant differences ( $q < 0.05$ ).

|              | 0      | 30     | 60     | 90     | 120    | 180    | 240    | 300    | 360    | 420    | 480    | Q <sub>meal*time</sub> | Q <sub>meal</sub> | Q <sub>time</sub> |
|--------------|--------|--------|--------|--------|--------|--------|--------|--------|--------|--------|--------|------------------------|-------------------|-------------------|
| PC 16:0_16:1 |        |        |        |        |        |        |        |        |        |        |        |                        |                   |                   |
| Cheese       | 5.072  | 6.429  | 5.195  | 4.978  | 5.768  | 5.895  | 7.162  | 6.499  | 8.269  | 7.910  | 8.597  | 0.833                  | 0.564             | <0.001*           |
| Hom. Cheese  | 5.753  | 4.494  | 6.105  | 5.191  | 5.331  | 5.902  | 6.243  | 7.941  | 7.432  | 7.813  | 8.242  |                        |                   |                   |
| MCI Drink    | 5.122  | 5.259  | 5.680  | 5.494  | 5.913  | 6.845  | 6.473  | 7.240  | 6.908  | 7.992  | 8.298  |                        |                   |                   |
| MCI Gel      | 4.574  | 5.456  | 4.953  | 5.009  | 5.543  | 5.854  | 5.902  | 7.269  | 7.080  | 7.664  | 7.347  |                        |                   |                   |
| PC 16:0_16:0 |        |        |        |        |        |        |        |        |        |        |        |                        |                   |                   |
| Cheese       | 9.691  | 10.666 | 8.838  | 8.989  | 10.020 | 10.662 | 12.474 | 10.998 | 13.568 | 12.495 | 13.222 | 0.805                  | 0.564             | <0.001*           |
| Hom. Cheese  | 10.758 | 8.738  | 10.896 | 9.163  | 9.332  | 10.745 | 11.036 | 13.769 | 12.184 | 13.256 | 13.787 |                        |                   |                   |
| MCI Drink    | 9.434  | 9.276  | 10.107 | 10.071 | 10.277 | 11.412 | 11.241 | 11.937 | 11.556 | 12.747 | 13.527 |                        |                   |                   |
| MCI Gel      | 8.390  | 9.716  | 8.940  | 9.235  | 9.537  | 10.199 | 10.678 | 12.783 | 11.906 | 12.840 | 11.714 |                        |                   |                   |
| PC 16:0_18:2 |        |        |        |        |        |        |        |        |        |        |        |                        |                   |                   |
| Cheese       | 0.003  | 0.003  | 0.003  | 0.002  | 0.003  | 0.003  | 0.003  | 0.003  | 0.003  | 0.003  | 0.003  | 0.833                  | 0.164             | 0.001*            |
| Hom. Cheese  | 0.003  | 0.002  | 0.003  | 0.002  | 0.003  | 0.003  | 0.003  | 0.003  | 0.003  | 0.004  | 0.003  |                        |                   |                   |
| MCI Drink    | 0.003  | 0.002  | 0.003  | 0.003  | 0.003  | 0.004  | 0.003  | 0.003  | 0.003  | 0.002  | 0.003  |                        |                   |                   |
| MCI Gel      | 0.002  | 0.003  | 0.002  | 0.003  | 0.003  | 0.003  | 0.003  | 0.003  | 0.003  | 0.003  | 0.002  |                        |                   |                   |
| PC 16:0_18:1 |        |        |        |        |        |        |        |        |        |        |        |                        |                   |                   |
| Cheese       | 0.080  | 0.119  | 0.110  | 0.119  | 0.161  | 0.168  | 0.179  | 0.163  | 0.205  | 0.141  | 0.147  | 0.833                  | 0.562             | <0.001*           |
| Hom. Cheese  | 0.087  | 0.069  | 0.112  | 0.109  | 0.137  | 0.162  | 0.170  | 0.198  | 0.144  | 0.174  | 0.130  |                        |                   |                   |
| MCI Drink    | 0.070  | 0.075  | 0.106  | 0.108  | 0.135  | 0.186  | 0.151  | 0.173  | 0.148  | 0.139  | 0.149  |                        |                   |                   |
| MCI Gel      | 0.082  | 0.078  | 0.109  | 0.125  | 0.150  | 0.156  | 0.173  | 0.198  | 0.160  | 0.152  | 0.118  |                        |                   |                   |
| PC 16:0_20:5 |        |        |        |        |        |        |        |        |        |        |        |                        |                   |                   |
| Cheese       | 7.267  | 7.671  | 7.812  | 6.360  | 7.453  | 7.653  | 9.415  | 8.291  | 9.414  | 8.634  | 9.388  | 0.833                  | 0.424             | <0.001*           |
| Hom. Cheese  | 8.642  | 7.502  | 8.155  | 7.351  | 6.508  | 7.693  | 7.898  | 9.940  | 8.471  | 9.984  | 9.000  |                        |                   |                   |
| MCI Drink    | 6.176  | 6.866  | 7.739  | 6.835  | 6.551  | 8.149  | 7.295  | 8.388  | 7.607  | 8.182  | 7.672  |                        |                   |                   |
| MCI Gel      | 5.874  | 6.201  | 6.680  | 6.570  | 7.472  | 6.772  | 7.842  | 8.060  | 8.084  | 9.056  | 7.324  |                        |                   |                   |
| PC 16:0_20:4 |        |        |        |        |        |        |        |        |        |        |        |                        |                   |                   |
| Cheese       | 53.017 | 57.307 | 51.906 | 48.563 | 59.892 | 56.121 | 58.931 | 59.369 | 69.447 | 60.739 | 68.412 | 0.833                  | 0.123             | 0.001*            |
| Hom. Cheese  | 61.113 | 50.573 | 63.995 | 50.759 | 50.825 | 57.478 | 56.898 | 65.733 | 64.281 | 64.382 | 66.614 |                        |                   |                   |
| MCI Drink    | 52.989 | 50.125 | 59.369 | 56.005 | 57.183 | 65.967 | 55.036 | 64.754 | 57.382 | 60.446 | 64.003 |                        |                   |                   |
| MCI Gel      | 48.995 | 50.552 | 49.740 | 52.496 | 55.114 | 52.344 | 52.093 | 58.255 | 54.810 | 62.010 | 57.733 |                        |                   |                   |
| PC 16:0_20:3 |        |        |        |        |        |        |        |        |        |        |        |                        |                   |                   |
| Cheese       | 36.308 | 39.683 | 34.406 | 34.264 | 40.785 | 37.169 | 39.692 | 38.950 | 45.608 | 40.448 | 44.691 | 0.833                  | 0.149             | 0.015*            |

|              |        |        |        |        |        |        |        |        |        |        |        |       |       |         |
|--------------|--------|--------|--------|--------|--------|--------|--------|--------|--------|--------|--------|-------|-------|---------|
| Hom. Cheese  | 40.125 | 32.712 | 43.470 | 35.083 | 34.249 | 39.334 | 37.746 | 44.598 | 40.977 | 42.145 | 43.873 | 0.833 | 0.149 | 0.001*  |
| MCI Drink    | 36.841 | 35.994 | 40.062 | 39.637 | 39.498 | 44.632 | 39.277 | 45.303 | 39.322 | 42.059 | 43.593 |       |       |         |
| MCI Gel      | 34.328 | 37.643 | 33.424 | 36.397 | 37.211 | 36.100 | 36.261 | 41.057 | 37.225 | 40.547 | 38.605 |       |       |         |
| PC 18:0_18:2 |        |        |        |        |        |        |        |        |        |        |        |       |       |         |
| Cheese       | 62.528 | 66.782 | 59.592 | 58.044 | 68.535 | 64.647 | 68.489 | 67.666 | 79.597 | 69.881 | 75.162 | 0.794 | 0.564 | <0.001* |
| Hom. Cheese  | 72.295 | 58.446 | 74.605 | 62.109 | 62.004 | 69.370 | 68.449 | 80.272 | 75.143 | 75.214 | 79.318 |       |       |         |
| MCI Drink    | 62.839 | 63.981 | 71.910 | 70.142 | 70.584 | 80.326 | 69.793 | 80.915 | 71.258 | 75.330 | 77.505 |       |       |         |
| MCI Gel      | 59.248 | 63.692 | 58.446 | 63.375 | 66.344 | 64.022 | 65.910 | 72.556 | 66.974 | 75.973 | 70.297 |       |       |         |
| PC 18:0_18:1 |        |        |        |        |        |        |        |        |        |        |        | 0.833 | 0.553 | 0.001*  |
| Cheese       | 10.063 | 11.722 | 9.892  | 9.504  | 11.278 | 10.647 | 11.742 | 11.232 | 13.710 | 12.394 | 13.594 |       |       |         |
| Hom. Cheese  | 11.796 | 9.269  | 11.838 | 10.103 | 9.614  | 10.601 | 11.082 | 13.276 | 12.670 | 12.951 | 13.184 |       |       |         |
| MCI Drink    | 10.075 | 9.954  | 11.349 | 11.320 | 10.891 | 13.128 | 11.358 | 12.884 | 11.775 | 12.952 | 12.651 |       |       |         |
| MCI Gel      | 9.613  | 10.346 | 9.989  | 10.332 | 10.937 | 10.354 | 10.841 | 12.370 | 11.398 | 13.065 | 12.134 |       |       |         |
| PC 18:1_20:4 |        |        |        |        |        |        |        |        |        |        |        | 0.833 | 0.553 | 0.001*  |
| Cheese       | 22.339 | 24.184 | 21.813 | 20.986 | 24.327 | 23.586 | 25.371 | 24.012 | 29.151 | 25.502 | 27.689 |       |       |         |
| Hom. Cheese  | 25.147 | 21.602 | 26.453 | 22.323 | 20.985 | 24.125 | 24.540 | 29.716 | 26.066 | 28.699 | 27.587 |       |       |         |
| MCI Drink    | 21.489 | 21.505 | 24.650 | 23.075 | 23.667 | 26.302 | 23.154 | 26.668 | 23.934 | 25.408 | 26.315 |       |       |         |
| MCI Gel      | 20.371 | 21.866 | 21.521 | 22.479 | 24.124 | 22.226 | 22.567 | 24.615 | 24.081 | 26.155 | 24.755 |       |       |         |



Table S5. List of investigated metabolites. CER, ceramide; LPC, lysophosphatidylcholine; LPE, lysophosphatidylethanolamine; PC, phosphatidylcholine; PE, phosphatidylethanolamine; SM, sphingomyelin.

|    | Class | Species       |
|----|-------|---------------|
| 1  | CER   | CER 18:0_18:1 |
| 2  |       | CER 18:0_18:2 |
| 3  |       | CER 18:0_20:2 |
| 4  |       | CER 18:0_22:1 |
| 5  |       | CER 18:0_24:0 |
| 6  |       | CER 18:0_26:2 |
| 7  |       | CER 18:0_26:3 |
| 8  | LPC   | LPC 16:3      |
| 9  |       | LPC 18:0      |
| 10 |       | LPC 18:1      |
| 11 |       | LPC 18:4      |
| 12 |       | LPC 20:0      |
| 13 |       | LPC 22:0      |
| 14 |       | LPC 24:0      |
| 15 | LPE   | LPE 16:0      |
| 16 |       | LPE 18:0      |
| 17 |       | LPE 18:1      |
| 18 |       | LPE 18:2      |
| 19 |       | LPE 20:1      |
| 20 |       | LPE 20:2      |
| 21 |       | LPE 20:3      |
| 22 |       | LPE 22:6      |
| 23 | PC    | PC 16:0_16:0  |
| 24 |       | PC 16:0_16:1  |
| 25 |       | PC 16:0_18:1  |
| 26 |       | PC 16:0_18:2  |
| 27 |       | PC 16:0_20:3  |
| 28 |       | PC 16:0_20:4  |
| 29 |       | PC 16:0_20:5  |
| 30 |       | PC 18:0_18:1  |
| 31 |       | PC 18:0_18:2  |
| 32 |       | PC 18:1_20:4  |
| 33 | PE    | PE 16:0_18:1  |
| 34 |       | PE 16:0_18:2  |
| 35 |       | PE 16:0_20:4  |
| 36 |       | PE 16:0_22:6  |
| 37 |       | PE 18:0_16:0  |
| 38 |       | PE 18:0_18:1  |
| 39 |       | PE 18:0_18:2  |
| 40 |       | PE 18:0_20:4  |
| 41 |       | PE 18:0_22:6  |
| 42 |       | PE 18:1_16:0  |
| 43 |       | PE 18:1_18:0  |

|    |    |              |
|----|----|--------------|
| 44 |    | PE 18:1_18:1 |
| 45 |    | PE 18:2_22:1 |
| 46 | SM | SM 18:0_14:0 |
| 47 |    | SM 18:0_20:0 |
| 48 |    | SM 18:0_22:0 |
| 49 |    | SM 18:0_22:1 |
| 50 |    | SM 18:0_23:0 |
| 51 |    | SM 18:0_24:0 |
| 52 |    | SM 18:1_22:0 |
| 53 |    | SM 18:1_23:0 |

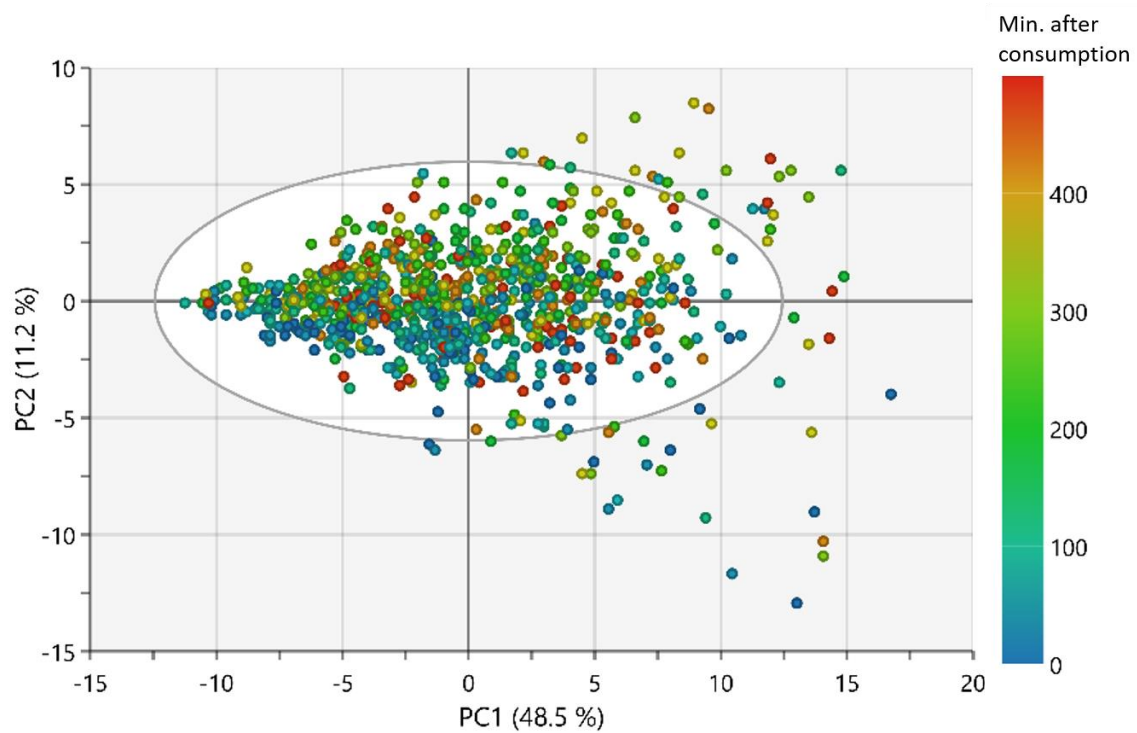

Figure S1. PCA scores plot of phospholipid content in plasma samples obtained from LC-MS. Colors indicate time after consumption of test meals.

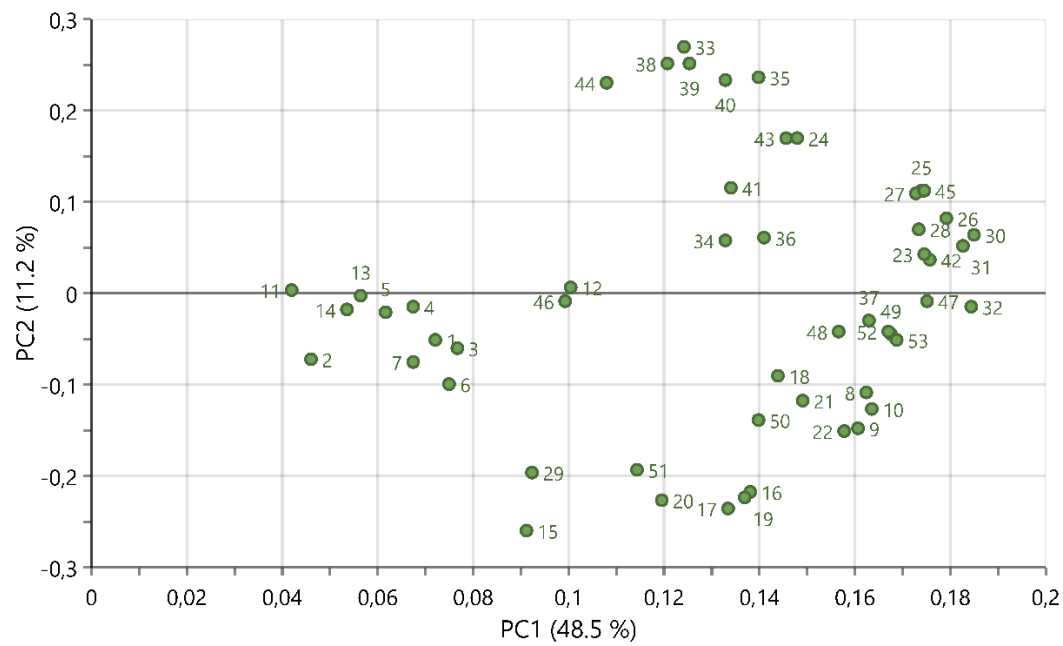

Figure S2. Corresponding PCA loadings plots containing 53 phospholipids. The phospholipids belonging to each of the numbers can be seen in Table S5.

1)

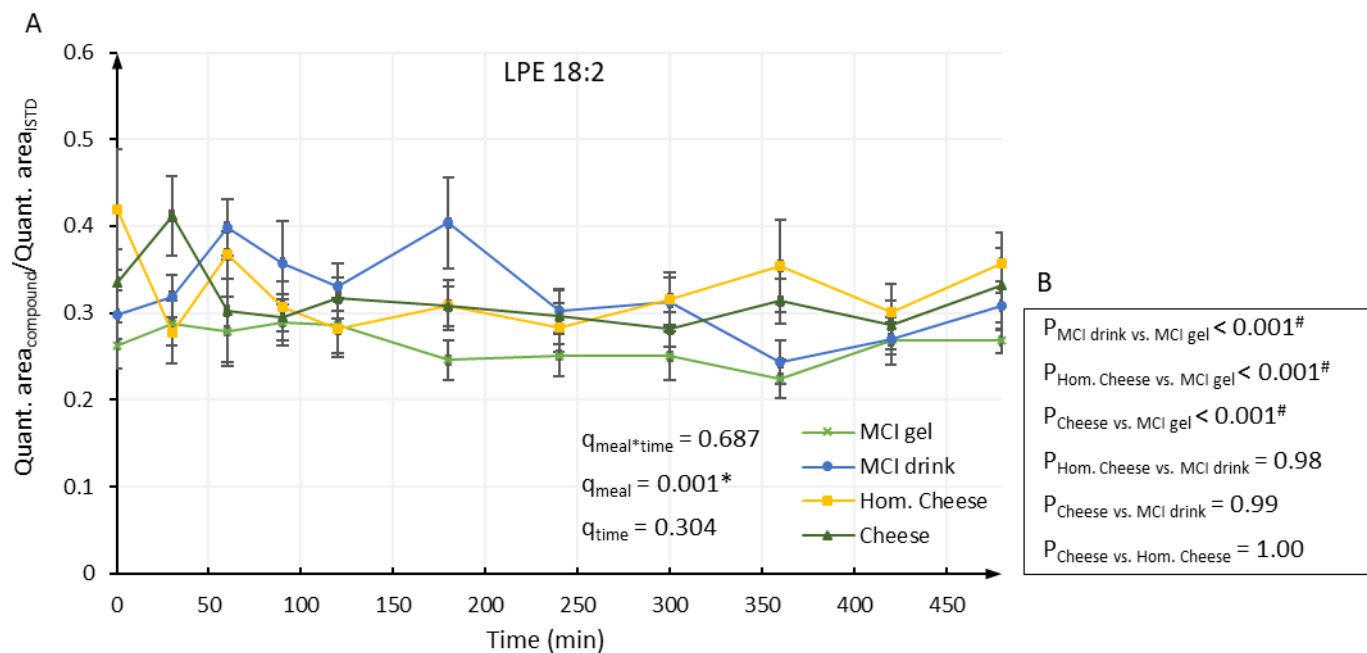

2)

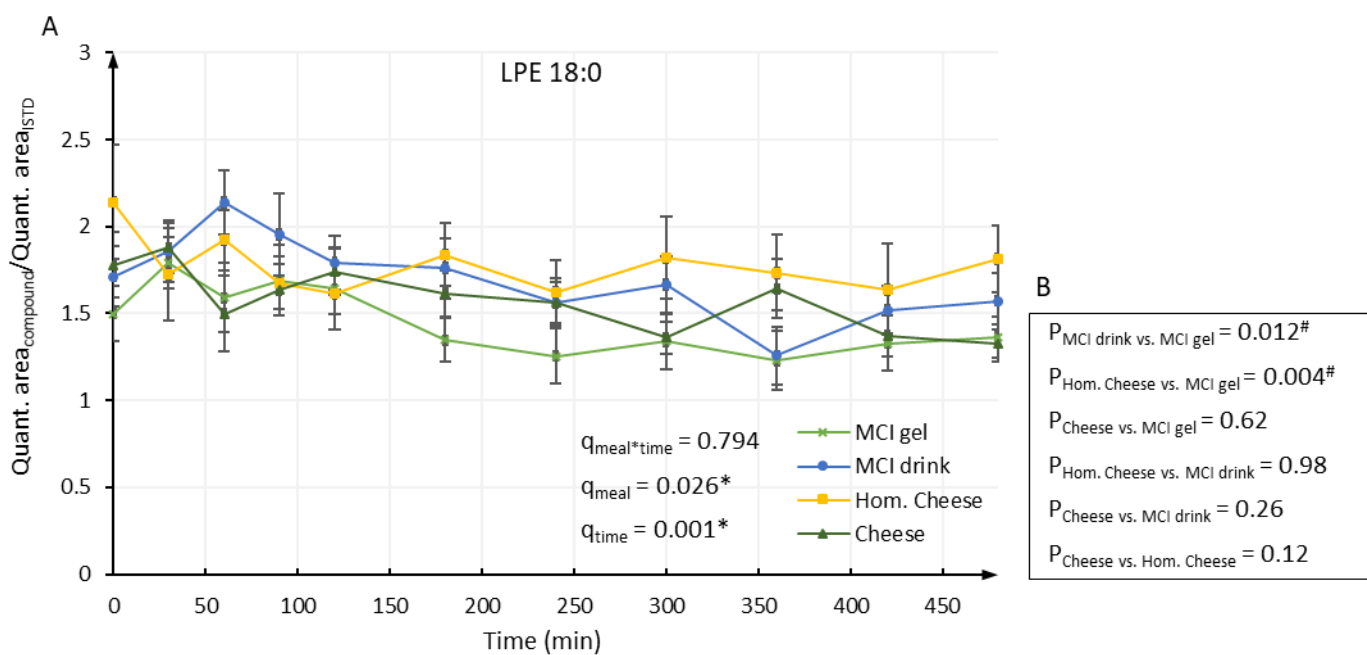

3)

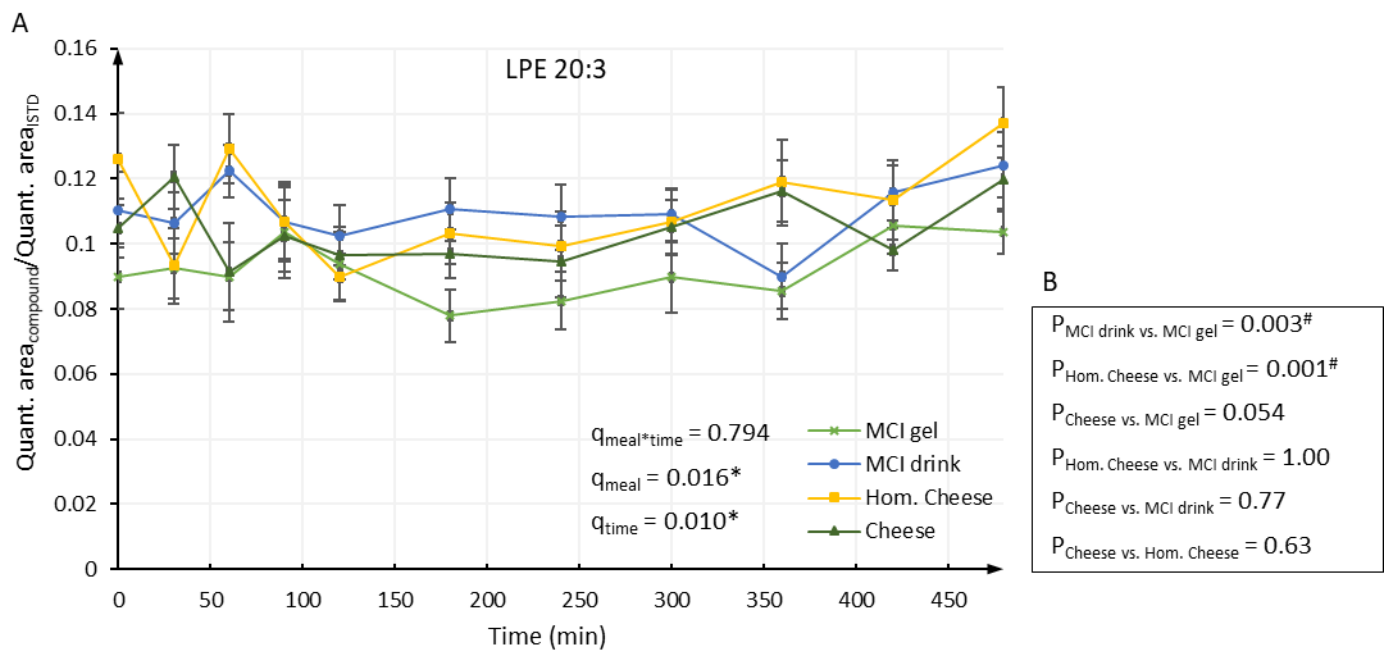

4)

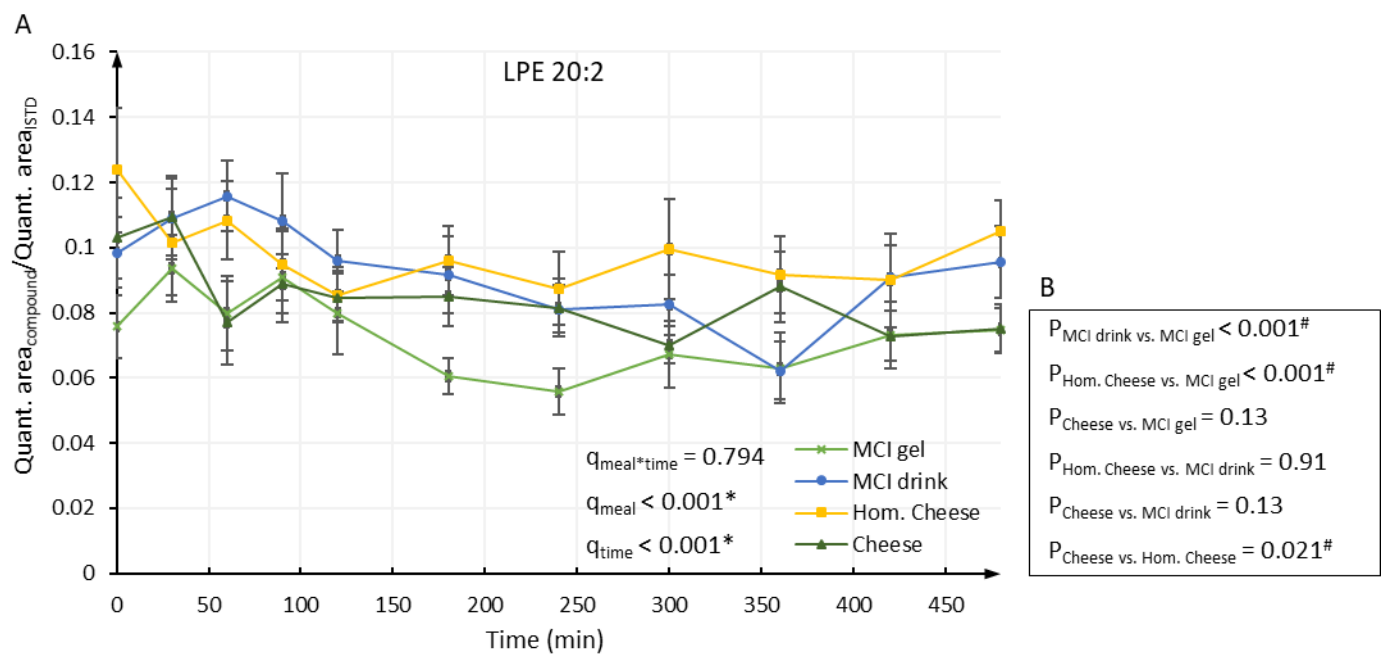

5)

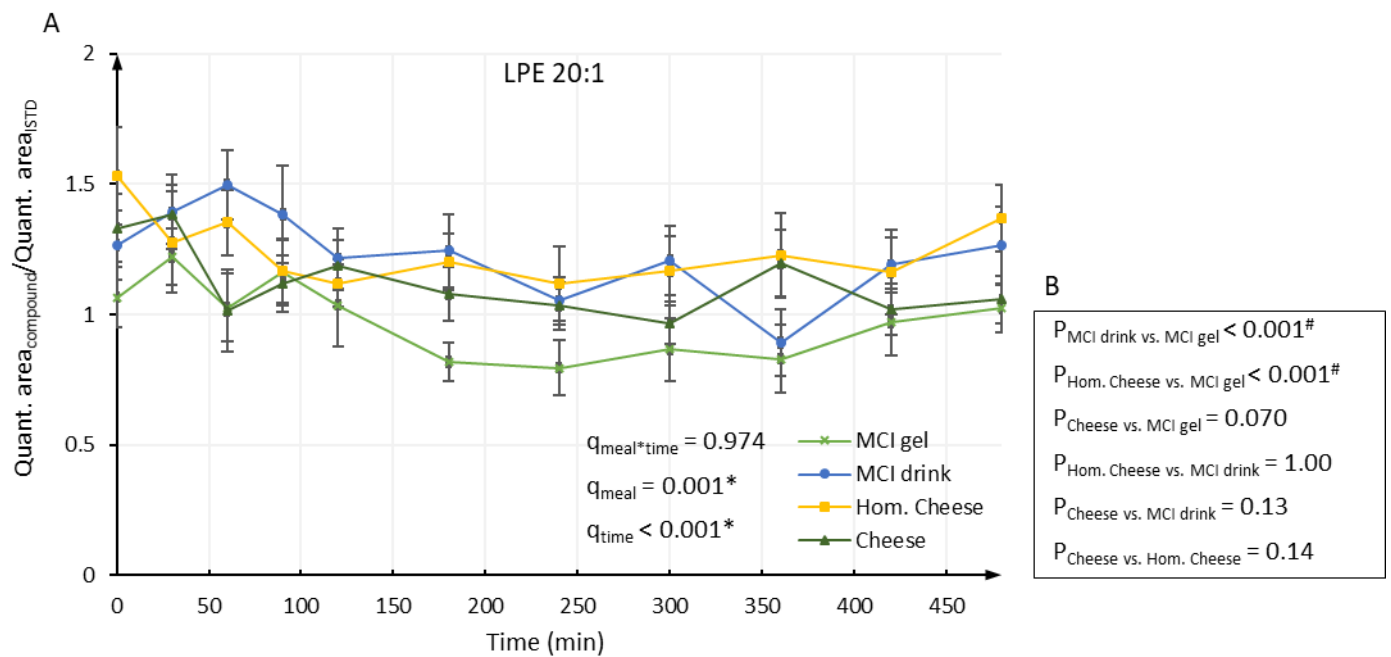

6)

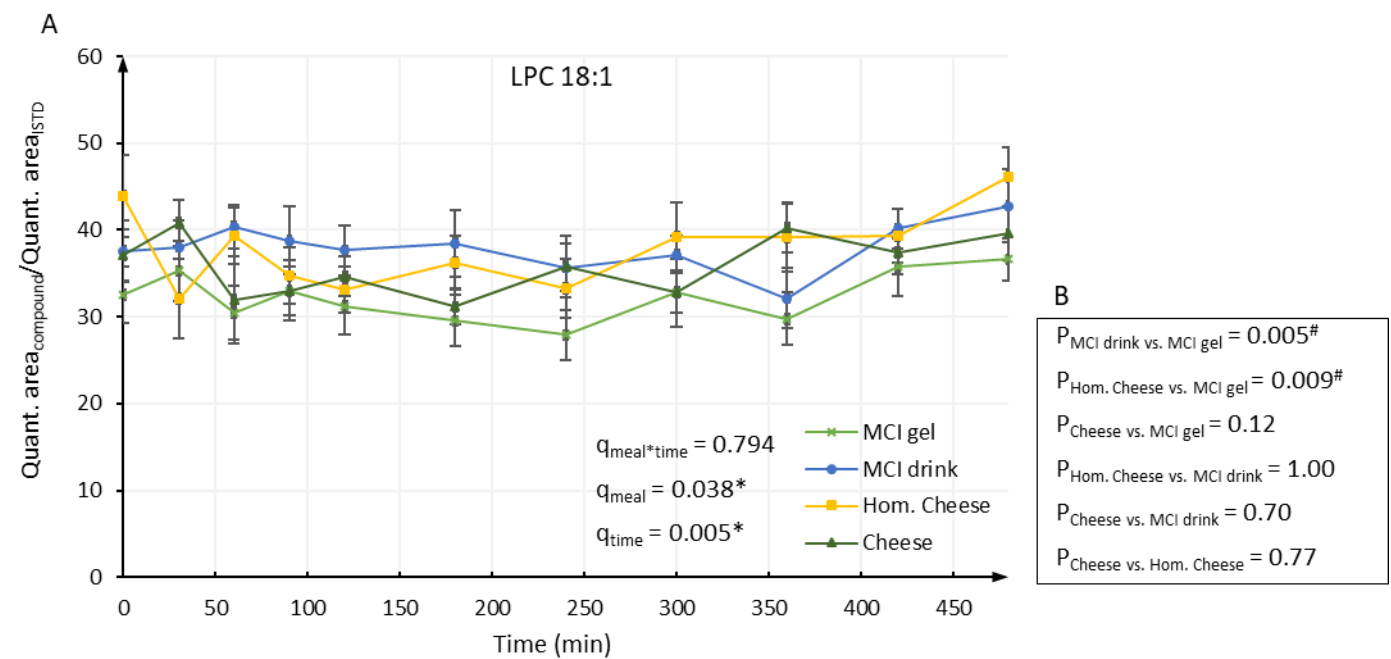

7)

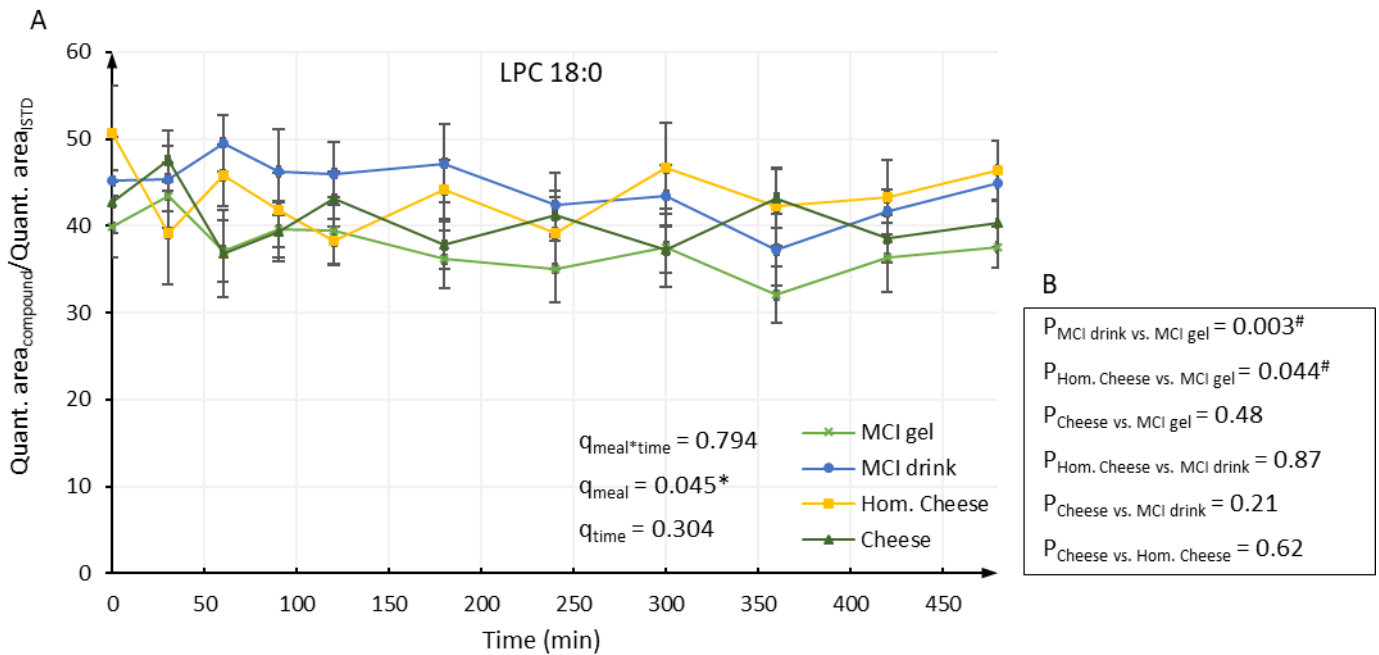

Figure S3. Relative level of phospholipids in plasma samples for 1) LPE 18:2, 2) LPE 18:0, 3) LPE 20:3, 4) LPE 20:2, 5) LPE 20:1, 6) LPC 18:1, 7) LPC 18:0. A) Data were analyzed by repeated measures using linear mixed model. Overall participant and within-visit participant differences were included as random factors and the analyses were adjusted for BMI, age and visit.  $q$ -values indicate FDR-adjusted  $p$ -values for meal-time interactions ( $q_{\text{meal} \times \text{time}}$ ), the effect of meal ( $q_{\text{meal}}$ ) and the effect of time ( $q_{\text{time}}$ ). \* indicate significant differences ( $q < 0.05$ ). B)  $p$ -values obtained from Tukey's all-pairwise comparison conducted when a significant meal effect was observed in repeated measures analysis. # indicate significant differences ( $p < 0.05$ ).
